# Supplementary material for: Oral Bicarbonate Therapy in Non-Haemodialysis Dependent Chronic Kidney Disease Patients: A Systematic Review and Meta-Analysis of Randomised Controlled Trials
Source: MDPI journal article supplement (doi:10.3390/jcm8020208), 2019-02-07
Supplement: s1 [file s1]

## Supplementary Material

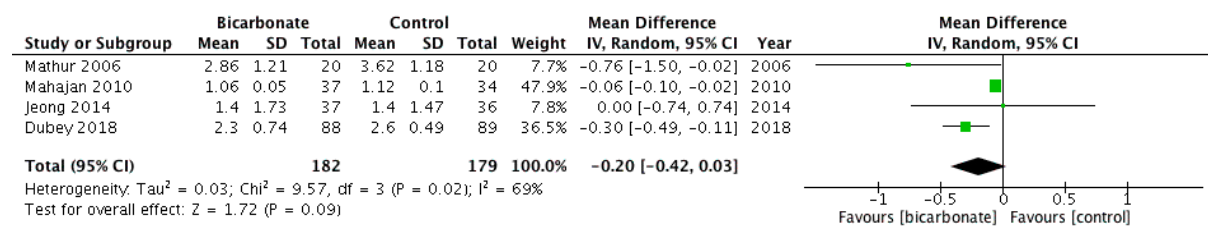

**Supplementary Figure S1.** Forest plot comparing the effects of oral bicarbonate therapy and control on serum creatinine levels.

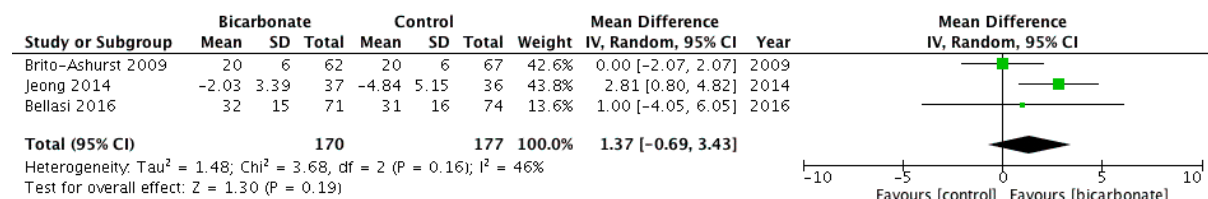

**Supplementary Figure S2.** Forest plot comparing the effects of oral bicarbonate therapy and control on eGFR at one year.

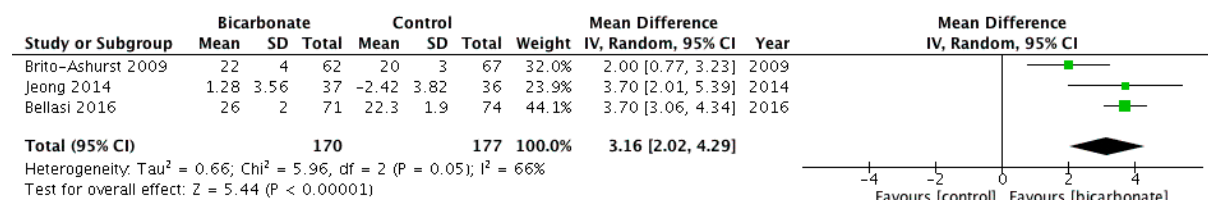

**Supplementary Figure S3.** Forest plot comparing the effects of oral bicarbonate therapy and control on serum bicarbonate levels at one year.
